# Supplementary material for: Serum protein profiling reveals an inflammation signature as a predictor of early breast cancer survival
Source: Breast Cancer Res. 2024 Apr 9;26:61. doi: 10.1186/s13058-024-01812-x (PMC11005292; doi:10.1186/s13058-024-01812-x)
Supplement: Supplementary file 1 — Supplementary Material 1 [file 13058_2024_1812_MOESM1_ESM.xlsx]

## Sheet: Sheet1
Supplementary Table 1. Proteins from the Olink Target 96 Inflammation (v.3024) panel included in the analyses. Normalized NPX data for each sample.
			Pass	Pass	Pass	Pass	Pass	Pass	Pass	Pass	Warning	Pass	Warning	Pass	Pass	Pass	Pass	Pass	Pass	Pass	Pass	Pass	Pass	Pass	Pass	Pass	Pass	Pass	Pass	Pass	Pass	Pass	Pass	Pass	Pass	Pass	Pass	Pass	Pass	Pass	Pass	Pass	Pass	Pass	Pass	Pass	Pass	Pass	Pass
			malignant	malignant	malignant	malignant	malignant	malignant	malignant	malignant	malignant	malignant	malignant	malignant	malignant	malignant	malignant	malignant	malignant	malignant	malignant	malignant	malignant	malignant	malignant	malignant	malignant	malignant	malignant	malignant	malignant	malignant	malignant	malignant	malignant	malignant	malignant	malignant	malignant	malignant	malignant	malignant	malignant	malignant	malignant	malignant	nonmalignant	malignant	malignant
protein name	Uniprot ID	OlinkID	Sample1	Sample2	Sample3	Sample4	Sample5	Sample6	Sample7	Sample8	Sample9	Sample10	Sample11	Sample12	Sample13	Sample14	Sample15	Sample16	Sample17	Sample18	Sample19	Sample20	Sample21	Sample22	Sample23	Sample24	Sample25	Sample26	Sample27	Sample28	Sample29	Sample30	Sample31	Sample32	Sample33	Sample34	Sample35	Sample36	Sample37	Sample38	Sample39	Sample40	Sample41	Sample42	Sample43	Sample44	Sample45	Sample46	Sample47
4E-BP1	Q13541	OID00536	1.00599	0.01575	-0.31964	2.78634	2.06874	3.14668	2.56919	2.94178	-0.89968	2.45185	2.72314	2.63028	4.06144	2.79107	2.58474	3.28837	3.5345	1.88738	1.77695	4.84966	1.93612	5.33791	2.89519	0.12421	-0.12095	2.47625	0.32063	5.00245	4.563	3.29274	2.52772	5.47186	3.19109	3.16331	2.36944	1.36042	2.18338	2.08185	3.13898	2.85669	2.20503	1.80042	1.36124	0.81796	4.08869	1.91734	2.98864
ADA	P00813	OID00560	2.17281	1.63995	1.30656	1.21478	2.58327	1.99885	2.49307	1.36858	1.36691	2.34908	1.60729	1.7589	1.44668	0.98272	2.51357	1.89036	2.97209	0.8944	1.67478	2.16822	1.18914	2.82256	1.7745	1.40475	1.14482	1.47428	1.313	1.84305	0.62186	2.32228	2.82912	2.87552	1.39447	0.90936	2.04926	2.31508	2.22399	1.98139	1.99525	1.46141	2.10927	2.10532	2.9575	2.02955	2.10711	1.2608	0.89028
AXIN1	O15169	OID00487	0.46871	0.60431	-0.02478	1.76703	1.57479	1.77501	0.59056	1.96575	0.04864	0.81132	0.46058	0.6686	1.24663	0.6874	1.37332	1.47784	1.2426	0.96719	1.0859	1.93652	1.00571	1.12381	0.95538	0.80717	0.77557	2.41232	0.02311	2.22695	1.11824	1.18054	0.99817	1.33687	1.17269	0.81971	1.22822	1.09238	1.69271	0.35616	1.81133	1.50945	1.59143	1.02733	0.85628	0.9321	0.38999	1.15723	1.59958
CASP-8	Q14790	OID00550	4.58667	4.18127	3.8568	6.13846	5.54822	4.80776	4.05879	4.752	3.07245	3.81741	3.83667	4.54591	4.60831	4.43973	4.88575	5.43946	4.16858	4.58919	4.16847	4.62698	4.41128	4.45678	4.40547	4.85181	4.40277	5.59307	3.11987	5.83913	4.69994	3.95571	4.25661	4.07712	4.81309	3.68752	4.78439	4.28116	4.74793	4.5035	5.36119	5.84169	5.48827	4.81644	3.88108	4.507	3.48856	4.89513	4.51917
CCL11	P51671	OID00505	5.96943	4.74509	6.23898	6.6786	6.54541	6.46995	7.13644	6.70107	5.64479	7.48701	7.35967	5.99993	6.82592	6.38626	6.17186	6.25927	7.05937	6.95534	6.74957	6.62284	6.83048	7.00118	6.28475	6.16619	6.00416	6.67001	5.76176	7.05494	7.2337	7.17579	7.13706	7.23581	6.55629	6.30358	7.01355	6.9464	7.20784	6.71991	6.92595	6.96829	7.4068	6.79808	5.96685	6.26184	6.8699	7.15871	7.47287
CCL19	Q99731	OID00513	9.58951	9.58459	10.3284	12.076	9.82535	8.98061	10.3437	8.90222	10.157	9.42526	10.5172	8.18485	9.43023	9.21425	8.26662	9.97364	10.222	9.39167	11.0673	9.20993	9.24534	9.42709	8.66243	9.74885	8.72261	8.51936	8.20858	10.1259	8.89546	9.82811	8.29779	10.4138	8.00177	12.454	11.632	12.3167	9.37808	9.38859	9.66912	9.49052	9.20511	9.64854	8.99805	9.19284	9.163	12.2846	9.47152
CCL20	P78556	OID00556	5.57736	6.31606	6.34916	6.57165	7.08751	5.71251	7.44122	5.35017	9.4818	7.95853	8.32911	5.99417	6.8388	6.16665	6.78092	6.31616	7.9479	6.35908	6.58547	6.36115	7.68187	7.05057	6.32906	6.78982	7.0261	5.7528	6.17831	6.93851	8.15405	9.54316	6.41673	6.98398	5.49319	5.5721	6.94371	6.39317	7.76961	7.61067	7.11645	6.7438	7.41186	5.86269	6.10335	9.08732	6.4124	7.13434	6.33214
CCL23	P55773	OID00530	9.72716	10.2737	10.4415	10.0568	11.0685	10.6078	10.339	11.2107	10.6152	10.8593	11.3492	10.6013	9.82076	10.9583	10.7312	11.2386	11.0411	10.8623	10.7088	10.4009	10.6622	10.026	10.5327	9.949	10.7514	10.5375	9.75631	10.9321	10.0414	11.0603	10.9631	11.3663	10.3502	9.89821	10.7134	11.1395	10.7347	11.2557	10.9986	11.469	10.6006	10.7581	10.4317	10.4317	10.1157	10.9793	11.1645
CCL25	O15444	OID00551	3.18517	3.23735	3.98075	4.54889	4.40911	4.49358	6.53693	4.75983	4.52605	5.62331	5.37638	4.58026	4.1538	4.32573	5.01643	5.92453	6.01624	4.43745	6.03563	4.92005	5.82639	4.03059	5.10193	3.70878	4.86312	5.06184	4.27061	4.96912	4.55496	5.60281	4.52739	4.93328	5.16602	4.40948	4.64878	5.51406	5.53411	5.18899	5.66041	5.31971	4.888	5.85402	4.9138	4.24906	4.24257	4.73553	4.91888
CCL28	Q9NRJ3	OID00539	0.35501	1.49395	1.36676	0.8757	0.67236	1.06724	1.28373	1.19236	0.69668	2.38425	1.59099	1.70782	0.84833	1.47595	0.13291	1.05153	1.23469	2.66031	1.47587	1.72847	1.2491	0.60938	1.14807	0.27095	1.26772	2.86651	0.32036	1.78807	1.73664	1.4917	1.06062	1.3235	1.39734	1.16861	0.91045	1.43016	0.87434	2.4166	2.06434	4.00737	2.09051	1.14972	1.5351	0.96055	1.30804	1.33287	1.51137
CCL3	P10147	OID00532	6.38329	5.6064	6.15053	6.57567	7.2349	5.40989	5.6448	4.84795	6.10013	6.11188	7.20553	6.03778	5.59388	5.20021	6.48435	6.53123	6.52015	5.83456	5.59124	5.71259	5.97866	5.56506	5.9672	6.17198	5.4081	5.55789	5.38924	6.86366	6.19501	6.01194	5.92402	6.79821	5.6999	6.23069	6.85986	6.00537	5.80055	5.81765	7.05849	7.11242	5.94305	6.01924	5.82611	5.62226	5.73758	5.86372	5.6085
CCL4	P13236	OID00498	6.16127	5.43598	5.78619	6.5522	7.25947	5.71157	5.74385	5.24932	6.20703	6.5854	6.66892	6.60984	6.27131	5.86609	7.03599	6.38467	7.07272	7.07347	6.18485	5.65295	7.1237	5.43357	6.26533	6.66215	5.15513	5.89913	5.57885	7.29766	5.96351	6.81584	5.99796	7.474	5.95538	6.40496	7.02901	6.82159	6.66654	5.58632	7.38602	7.14536	6.30279	6.66802	6.22402	5.60358	6.31888	6.20777	6.44358
CD244	Q9BZW8	OID00477	4.44951	4.56485	4.21147	5.27309	5.17656	4.84553	4.60515	4.44258	4.88457	4.76061	4.83018	4.7128	4.27265	4.54749	4.6724	4.28571	5.3884	4.46751	4.08909	4.47953	4.4264	4.26197	3.84897	4.37587	4.78001	4.66011	3.94531	4.97041	4.43511	5.01601	4.81544	5.07381	4.51074	4.45876	4.88966	4.83878	5.11246	5.54354	4.92687	5.54548	4.6329	5.00491	4.809	4.65434	4.68595	4.76992	4.83405
CD40	P25942	OID00542	9.89624	10.2445	9.93474	10.2875	10.4381	9.60379	10.0823	9.8504	10.1009	10.5263	11.1606	9.96206	9.85394	9.72422	10.5003	10.6305	10.5399	9.62413	9.97726	10.3407	9.65497	10.0282	9.89031	10.0012	10.3678	10.4157	9.5501	10.9751	10.2881	10.4646	10.3612	9.88462	10.2604	10.2258	10.6273	10.1415	10.6379	10.5774	11.0687	10.5539	10.5374	10.713	9.84811	10.2485	9.9089	10.4562	10.6875
CD5	P06127	OID00531	4.60406	4.53167	4.19415	4.97683	5.78709	4.46395	4.67147	4.2458	5.3781	5.58316	5.2512	4.50001	4.81149	4.55147	4.94621	4.98163	5.23839	4.73263	4.357	3.96259	4.85701	4.88972	4.18749	4.36844	4.85811	4.65584	4.76134	5.31565	4.76937	5.37939	4.75354	5.35903	4.94553	4.63848	5.25572	5.29756	4.94717	5.54403	5.07885	5.53944	5.16887	4.93178	4.61625	5.00318	4.315	4.74626	5.02331
CD6	P30203	OID00499	3.86128	5.27031	4.63284	4.95104	5.50857	5.06978	4.62622	3.81074	5.10517	4.79479	5.31212	4.32321	4.79858	3.68505	4.35064	4.48341	5.33674	4.34957	3.77928	4.01617	4.29366	4.00456	3.84074	4.76312	4.6281	4.282	4.5329	5.47159	4.397	5.80554	4.48832	5.03216	4.67708	4.56537	5.80961	4.76377	4.81637	5.20701	5.35571	5.28356	4.84924	4.6189	4.72359	4.41521	4.84692	5.08467	4.69126
CD8A	P01732	OID05124	6.49557	3.73192	2.92401	6.74732	5.06042	8.57963	6.53626	6.71782	2.67715	6.9665	5.48367	5.26376	7.71302	7.70359	7.99831	8.08967	8.83062	6.26079	6.44351	8.34425	7.84292	8.06414	5.49205	5.25936	3.43915	7.01166	7.34896	8.42754	6.59573	8.82016	8.13762	9.45409	6.95526	7.77585	6.6834	7.39576	8.33483	6.27448	7.02469	6.00294	6.96975	6.2654	7.40804	4.29625	10.3593	7.44877	7.90906
CDCP1	Q9H5V8	OID00476	2.32757	2.95053	3.10058	2.63014	3.71486	3.10026	3.21725	2.05642	4.26776	3.19383	4.77782	2.57496	2.43412	2.44747	2.28619	2.95517	4.24785	2.06397	2.43764	2.26051	2.54483	2.90882	2.08217	3.08598	2.58985	2.58229	1.86847	3.88902	5.5682	3.56593	3.05754	3.18208	3.20307	3.2284	3.79319	2.81882	2.92029	3.38703	3.5062	3.03506	3.15428	3.08165	2.58588	2.88072	2.34055	3.46627	3.40276
CSF-1	P09603	OID00562	8.55586	8.35325	8.52116	8.77656	8.95522	8.78209	8.72745	8.45633	8.89596	8.75112	8.791	8.55233	8.58484	8.65771	8.79624	9.03076	8.97199	8.62404	8.70022	8.53379	8.65356	8.52074	8.64549	8.62777	8.46606	8.74729	8.34392	9.13064	8.97409	9.09149	8.8689	8.94805	8.51752	8.61141	8.83369	8.79717	9.02532	9.01551	8.80415	8.99909	8.98238	8.75965	8.7689	8.55851	8.74957	8.90006	8.81216
CST5	P28325	OID00491	5.97691	5.9893	5.7686	5.70719	6.51736	6.24633	6.13566	5.94648	5.99208	6.37069	6.83693	6.14793	5.66716	5.82091	5.89716	5.91669	7.09073	6.78922	6.5823	5.96645	5.88552	6.29937	6.24603	5.64231	6.31687	6.10769	5.83272	6.44368	5.93023	6.41115	6.54477	6.86091	6.55044	6.21223	6.5296	5.81916	5.95318	7.16805	6.03917	6.72102	6.82609	6.54256	6.29393	5.69191	7.10525	6.1873	7.33461
CX3CL1	P78423	OID00552	3.50667	4.03959	4.6948	4.32345	5.03201	3.40162	4.8637	3.52056	4.13649	4.44384	4.81758	4.07191	3.47577	3.83106	4.56748	5.03923	4.58398	4.99061	4.44388	2.95773	4.14331	3.79662	3.62875	4.53594	4.62806	4.10294	3.87232	4.54149	4.01118	4.04309	4.49082	4.09938	3.89042	3.63189	4.60828	4.46173	4.52871	5.24937	4.11045	5.20739	4.70766	4.3175	3.79252	4.05682	3.94067	3.8991	4.22976
CXCL1	P09341	OID00496	8.00985	7.83885	7.89286	8.61791	8.68102	8.12861	8.20007	8.20713	8.87281	8.39515	8.69408	8.58123	8.07277	7.761	7.79003	8.25197	8.03719	7.93896	7.8204	8.46209	8.38685	7.91399	7.47055	8.79211	8.89007	8.20242	7.86637	8.9587	8.55653	8.58424	9.00029	8.78485	7.60686	7.78971	8.94971	9.0046	8.81656	8.74376	10.6678	8.99464	8.47605	8.37093	8.487	8.13518	8.73297	8.57042	8.76665
CXCL10	P02778	OID00535	6.94453	7.3133	7.75596	9.11299	8.09833	7.94181	7.68612	6.92624	8.61811	7.85806	9.25831	7.12006	6.89523	6.71989	7.14654	7.82741	8.58747	6.74416	7.14679	7.07512	7.84685	7.48317	7.23684	6.87583	7.02327	8.11296	6.796	9.41606	8.56829	7.90006	6.69865	8.12827	7.12921	7.84958	8.69177	7.97211	8.05557	7.71451	8.06294	8.17802	8.08972	7.31214	8.07066	7.64402	8.15577	7.40793	7.07449
CXCL11	O14625	OID00486	5.79548	7.42927	6.6043	7.92513	7.88796	7.44834	8.44201	7.19466	7.32007	7.1355	8.78691	6.98079	6.25113	7.21434	6.47184	7.09291	7.43063	6.07538	7.45738	7.75557	8.06185	6.55265	5.95834	6.21398	7.45072	7.77694	6.31156	7.99738	7.2885	7.93093	6.84801	7.37317	6.56153	7.29901	8.48251	8.12757	8.23447	6.77192	7.65587	7.8682	8.3385	7.18696	7.96508	7.26374	7.77535	6.89469	6.84638
CXCL5	P42830	OID00520	10.7218	11.4132	11.3174	10.5824	11.6071	10.8309	11.245	11.032	11.7491	11.8619	11.9785	11.7026	11.5958	11.2215	11.0392	11.4905	12.2025	10.7872	10.4969	11.6191	11.3656	10.772	9.85355	11.8143	11.6359	11.0147	11.8171	11.9548	10.6037	12.0731	12.4704	11.8021	10.5191	10.1906	11.7465	12.0529	12.4599	11.9876	11.2578	12.2157	12.0106	11.6085	11.3729	10.8027	12.2652	11.429	12.4354
CXCL6	P80162	OID00534	7.80716	7.49573	8.18845	8.28014	8.63157	8.23557	8.08829	7.46527	8.93964	8.75537	8.68675	8.32034	8.51442	8.12257	7.55873	8.4994	8.23742	8.40156	7.21212	8.20788	8.65693	7.91999	6.92169	9.21358	8.2084	7.92922	7.70469	7.93316	7.7515	8.68045	8.27203	8.23355	8.1743	7.93677	8.82301	8.58636	9.41629	8.63753	8.0933	9.42878	8.40808	8.4526	8.05762	8.04526	9.04729	8.20239	7.92646
CXCL9	Q07325	OID00490	5.40484	5.6802	6.27327	6.38715	7.22274	6.57935	6.36373	5.57444	7.12766	6.73771	8.28989	5.92812	5.10341	5.1496	5.73962	6.89445	6.88903	4.91436	6.24829	5.0747	6.9267	6.16369	5.7134	4.50789	5.67137	7.80734	5.89355	7.39489	8.37604	6.15691	5.98519	6.69665	6.14537	6.94172	7.24558	6.45924	6.84881	6.3331	6.65781	6.22225	6.73063	6.12008	6.28779	6.11538	6.18392	5.9755	5.82494
DNER	Q8NFT8	OID01213	7.26774	7.84997	7.77645	7.90931	8.09699	7.73956	7.66813	7.56465	7.76687	7.56102	8.00183	7.76771	7.70269	7.59243	7.3093	7.63049	8.06904	8.05876	7.88844	7.75176	7.76749	7.6251	7.94647	7.88784	7.98049	8.05484	7.27852	7.71162	7.73259	8.12154	8.24457	8.06065	8.02381	7.72266	8.08229	8.38989	7.86064	8.51812	8.32098	8.03793	8.22782	7.94405	8.0154	7.88056	7.50391	8.20642	8.26742
EN-RAGE	P80511	OID00541	5.89947	11.9198	5.65547	7.18877	4.35564	6.56829	4.80545	6.1295	4.40937	5.00897	12.2654	4.91248	6.84853	6.06356	5.13102	6.13183	4.7361	6.31772	5.66217	5.72404	6.13776	7.11338	4.42119	13.129	13.1943	5.69812	3.3349	7.08568	5.17023	8.30465	6.62339	5.15444	4.94076	3.98665	13.0988	9.57122	5.96833	6.48388	11.3079	6.55522	5.15645	4.66673	5.62609	8.22038	6.02785	10.7903	11.8263
FGF-19	O95750	OID00545	7.0748	6.65625	8.75238	9.19117	8.9895	6.32956	6.60193	7.23322	8.81419	7.42151	8.9238	7.14295	6.24097	7.06886	7.26578	6.0396	7.9636	7.92002	8.23966	5.88142	6.82327	6.37158	6.86981	5.90111	8.35814	6.71076	6.00079	7.15125	5.92835	7.19726	7.51862	6.38865	7.86307	5.92907	7.82387	7.53327	8.69074	8.90162	8.24968	8.8079	7.60706	9.04906	7.18169	7.31269	8.41302	7.22459	9.23857
FGF-21	Q9NSA1	OID00512	2.70989	1.79637	2.55346	3.64099	3.11836	3.08531	3.87671	2.75131	4.14365	3.33847	5.75657	2.9716	2.53	4.76765	3.75278	4.65763	5.82726	5.09265	4.47935	4.89833	4.21995	5.10136	4.7295	4.05807	1.56926	1.48511	1.7089	8.22754	5.34555	4.20608	1.8231	3.86956	2.25254	4.9155	3.8437	2.86799	2.64376	3.86163	5.32224	4.95717	4.65306	1.50672	2.73362	1.31129	3.90074	4.24902	4.61148
FGF-5	P12034	OID00509	0.02742	0.02229	-0.06075	0.40621	-0.03886	0.62446	0.26625	0.70224	-0.2963	1.20782	0.76418	-0.06055	0.67606	0.47829	1.30445	0.67961	0.62478	0.77429	1.23881	0.77962	0.53667	0.98397	0.6377	0.2098	0.24558	0.52519	-0.09949	0.67865	0.62329	1.06629	0.76673	0.75441	0.47946	1.10825	0.60374	0.49416	0.00541	0.73605	0.8961	1.50034	0.41315	0.59251	0.82906	0.47001	0.18697	0.5599	0.70476
Flt3L	P49771	OID00533	8.27033	9.14864	8.84893	8.75456	9.65747	8.88027	9.26177	8.54393	8.94942	8.85658	9.21839	8.90529	8.35047	8.9182	8.74085	8.59396	10.0103	9.04241	8.79344	8.12237	8.766	9.07839	8.54887	7.96426	8.62846	8.67934	8.15978	9.43703	9.30168	8.54258	9.0527	9.33218	8.34187	8.83358	9.57112	8.98482	9.61005	9.02763	8.93486	9.09723	9.33157	9.37561	9.09049	9.04329	8.34532	9.11783	9.42321
GDNF	P39905	OID00475	-0.16878	-0.03981	0.50493	0.69434	0.39057	0.30155	1.05171	0.92376	2.24736	0.57147	1.25942	0.36305	0.97239	0.79351	0.45779	1.09092	1.0219	3.01453	0.66991	0.59401	0.28352	0.5802	0.56912	0.53145	0.12273	0.72819	-0.22236	0.81727	1.09754	1.32401	1.12384	1.28101	0.65026	1.49197	0.50135	0.17208	0.61349	1.13745	0.7795	0.94339	0.88637	0.29029	0.39217	-0.36193	0.77006	0.65663	1.03147
HGF	P14210	OID00522	7.7329	7.98126	8.0197	8.52522	8.76351	7.56822	8.40447	8.08065	9.25404	7.8232	8.48444	8.33357	8.49882	8.0398	8.38647	8.81478	8.52531	8.40872	8.39246	8.25788	7.90533	8.09921	7.99256	8.34527	8.42163	8.6385	7.31023	9.445	8.09993	8.81564	8.25773	8.04339	7.50325	7.77258	8.56256	8.93886	8.60113	8.44262	8.96208	8.49832	8.50958	8.48635	8.72999	8.09151	7.54174	8.96663	8.99406
IFN-gamma	P01579	OID05547	6.49882	6.20981	7.329	7.5745	8.52459	9.02006	7.07143	6.41873	7.35388	6.46767	9.52309	6.64834	6.03447	6.12355	5.94371	6.62326	7.44321	5.20814	6.22461	7.27772	7.57515	8.38512	5.84152	5.78005	6.61508	6.80473	6.276	6.4451	7.98703	8.6052	6.08627	6.97504	7.57658	7.32767	8.54677	6.69809	6.85311	6.95269	9.53675	7.19172	7.62406	6.83055	7.87174	7.25417	7.56421	6.48126	7.08133
IL-10RA	P22301	OID00528	1.11654	0.49079	-0.1384	1.5472	-0.23795	-0.27806	2.53919	-0.22836	0.45834	0.1888	0.41955	0.27521	0.64671	-0.06795	-0.3199	0.98576	0.2349	0.91566	0.16079	0.10022	-0.12417	-0.11715	-0.39815	0.39329	0.14816	-0.01999	-0.21097	3.25549	0.00843	1.07572	0.15732	-0.24397	-0.28709	0.07522	0.04968	2.02349	0.48273	1.09416	0.12107	0.19479	0.08532	0.03505	-0.12917	0.1437	-0.25371	0.28452	1.16096
IL-10RB	Q13651	OID00508	4.95109	5.22546	5.0997	5.60126	5.71489	4.57751	5.39407	4.88897	5.86299	5.76761	6.47538	5.21449	5.18642	5.35947	5.62672	5.41746	6.06433	5.76312	5.04871	4.77085	5.3376	5.28168	5.27594	5.71577	6.03659	5.04157	5.05643	5.70525	5.9388	5.80724	5.72104	5.53707	5.35521	5.07586	6.39707	5.80551	5.54518	6.16104	5.78598	6.24244	5.91112	5.67951	5.49987	5.38868	4.90616	5.63138	6.07925
IL-12B	Q08334	OID00515	5.19917	5.38626	4.40713	4.44123	6.35832	4.81358	5.16615	5.14457	6.07243	5.52696	6.49787	5.04624	5.23778	5.07275	5.28904	5.75036	6.71076	4.39868	3.8221	4.45926	5.71017	4.97346	3.53334	4.30419	5.08278	5.41363	5.31975	5.40179	4.20439	6.85604	5.47074	6.23764	5.03016	5.65825	5.9138	5.58181	6.13136	5.68249	4.57989	5.96233	4.88409	4.65498	5.39821	6.18158	5.74353	4.83207	4.64468
IL-15RA	P29460	OID00523	0.32262	0.50076	0.38511	0.68076	1.10632	0.81901	0.66113	-0.05305	0.34829	0.99362	0.86666	0.72715	0.36141	0.41394	0.65141	0.98406	1.08658	0.64952	0.57444	-0.11988	0.74853	0.35832	0.38482	0.47552	0.44968	0.23598	0.23425	1.3481	0.88375	1.23164	0.72443	1.07705	0.9645	0.74698	0.78312	0.7551	0.96187	1.08048	0.82215	0.9802	1.03123	0.50654	0.66604	0.77045	0.44321	0.73523	0.50868
IL-17A	Q13261	OID00514	-0.51497	-0.44025	-0.46768	0.08148	-0.27181	-0.1551	-0.00164	-0.24353	-0.39094	0.49516	0.67201	-0.43347	0.05167	0.0736	-0.21633	0.31601	1.48565	0.30452	0.09716	0.51536	0.62692	-0.2139	0.20893	-0.02339	0.55825	0.31828	-0.71993	0.1938	1.36699	0.7122	0.03971	0.14934	-0.36099	0.45349	0.67045	0.22291	0.42315	0.48156	0.83917	0.43218	-0.0388	0.23476	-0.19061	0.09655	-0.63876	-0.35342	0.09973
IL-18R1	Q16552	OID00485	5.79417	5.78242	5.68719	6.31192	6.2907	5.40494	6.16014	5.27193	7.05264	6.41964	6.51601	6.01049	5.53702	5.87794	5.94682	6.27415	6.64131	5.83753	5.62995	5.59799	6.47702	6.02731	6.20125	6.45288	5.99697	5.81863	5.30888	6.70247	5.86862	6.57377	6.49356	6.72099	5.79632	5.96004	6.51966	6.78154	6.63062	6.49764	7.17176	6.52675	6.58878	5.90165	6.57139	6.00945	5.31113	6.36711	5.81506
IL-20RA	Q14116	OID00501	-0.70942	-0.80729	-0.20236	0.06443	-0.48137	-0.39435	-0.03123	-0.44664	-0.86675	-0.35998	0.04267	-0.41195	-0.19917	-0.22851	1.69501	0.52207	0.02952	2.20602	-0.68887	-0.1776	-0.44918	-0.2964	-0.08857	0.28867	-0.35731	0.27421	-0.82236	-0.35627	0.15641	0.57633	-0.19572	-0.44292	-0.40252	0.42466	-0.06991	0.70307	0.77137	0.24896	0.06923	0.61902	0.12271	-0.24019	0.1995	-0.326	0.61902	-0.55238	0.57201
IL-22-RA1	Q13478	OID00517	0.58203	-0.82978	0.42581	0.92622	0.25728	0.42334	0.1173	-0.37601	0.38595	-0.02814	0.54244	-0.22762	0.35614	-0.7285	0.52799	0.3058	0.32993	1.28054	-0.01224	0.83022	0.07267	0.66716	-0.34011	0.23067	0.04404	-0.4707	-0.25182	1.32724	0.24377	0.86969	1.24139	0.73023	0.68815	-0.37725	0.41634	0.85169	0.6206	1.38075	0.83471	0.99413	0.23631	0.37485	0.33174	0.90709	-0.21217	0.39814	0.39625
IL-2RB	Q9UHF4	OID00489	0.54775	0.43125	1.43439	0.64384	1.651	0.80909	0.27695	-0.01567	0.67558	0.50986	1.15621	1.39539	0.3419	0.09577	0.02236	0.49142	0.51631	0.74349	-0.00229	0.54649	0.18145	0.1608	-0.11538	0.88783	0.92367	0.38174	0.16189	0.20013	0.151	0.65758	0.2513	-0.00097	0.22562	0.9794	0.67241	0.87699	0.61288	0.95904	0.83112	1.03819	0.24971	0.72218	0.2479	0.75084	0.44015	0.3854	0.2978
IL10	Q8N6P7	OID00516	0.6292	0.13811	1.66086	1.06631	1.54642	1.15844	1.85463	0.60314	1.04368	1.17018	1.28684	0.43333	0.68815	1.10084	0.95913	1.65544	1.98404	1.76157	0.85641	0.92271	2.69218	0.97507	0.62015	1.39467	0.85479	2.07074	0.32178	2.12014	1.90669	1.77408	1.28914	1.20242	0.92126	1.22088	1.1744	1.02436	0.77481	1.0673	1.83062	1.2181	0.97188	1.10756	1.30957	1.45626	1.39249	1.02644	1.08359
IL18	P14784	OID00492	7.60309	8.57547	7.47033	8.72612	8.26867	7.95512	8.74189	8.11151	8.28913	8.02388	8.98687	8.6355	7.12165	6.99438	8.57209	8.22918	8.58816	7.75596	7.83384	7.46118	8.27218	8.81005	7.83227	7.75715	7.99534	8.33358	7.33936	9.17484	9.42895	9.05681	7.68886	7.91135	8.15886	8.2044	8.55251	8.50484	8.20067	8.56023	8.22442	8.94452	8.41192	8.47414	8.56222	8.5587	7.73594	8.62115	7.79898
IL4	P05112	OID00546	-0.74182	-1.28623	-1.35777	0.13969	-0.28199	0.05447	0.05983	0.40405	-2.31321	0.5317	0.06051	-0.56377	0.01273	-0.00765	0.119	0.29991	-0.41133	0.67147	-0.59273	-0.61576	-1.09478	-0.9282	-0.85938	-1.35969	-0.7528	0.90522	-1.69424	-0.75165	-0.10077	0.68248	-0.24105	0.52432	-0.25608	0.06099	-0.23529	0.15852	0.52612	0.02021	0.32781	0.71759	0.02457	-0.75713	-0.53505	-0.70575	-0.36303	-0.69745	-0.09779
IL6	P05231	OID00482	2.42662	2.13294	1.84688	2.58854	2.36939	2.24578	2.73091	1.32246	2.31316	2.10072	4.3355	2.10584	1.73712	1.40536	3.52334	3.00753	2.73495	1.53441	2.33477	1.16093	1.53234	2.28506	2.04693	2.29178	2.92534	1.20097	1.34091	6.0695	3.57905	3.81442	1.82404	2.12607	1.55518	2.54573	2.83039	1.86528	2.13606	2.26571	3.9492	2.41785	3.35113	1.88282	2.74045	1.66415	2.71505	3.25788	1.74381
IL7	P13232	OID00478	1.78596	1.78527	2.49979	1.4114	2.06443	1.19706	1.70768	1.58013	2.21249	1.547	1.89988	2.34937	1.69552	1.91657	1.71224	1.61694	2.26527	2.1687	1.44508	2.11546	1.59875	0.92084	1.57251	1.43019	1.76022	2.31428	1.76925	2.28314	1.99483	1.73133	2.04221	2.05713	1.04129	1.38594	2.08305	2.36418	2.02143	2.84507	2.59792	2.32488	2.05113	1.80656	2.74018	1.29765	1.92397	1.99609	1.75529
IL8	P10145	OID00471	5.73713	4.99196	6.54867	6.08416	7.31438	6.15724	5.95899	5.98734	7.36269	6.51831	7.27139	6.26736	5.79614	4.64956	5.60178	8.12025	6.05509	5.5371	5.45973	5.99129	5.32625	5.46418	11.6845	5.72293	8.99869	6.28259	5.74189	7.64713	7.25982	5.74338	5.98014	7.04196	5.51893	5.53061	6.9104	6.19682	6.46714	6.31821	5.94147	6.31591	6.73598	6.05457	6.04473	6.01929	6.41913	6.0904	6.32931
LAP-TGF-beta-1	P01137	OID00480	5.35329	4.60713	5.36221	6.96941	6.10881	6.10286	6.19307	6.28131	5.55393	5.83833	6.0074	5.18266	6.36682	6.32257	5.93079	6.14421	6.41393	6.20643	6.29275	6.54465	6.46757	6.46072	6.55266	5.60271	5.43045	6.30746	5.32238	7.33511	6.4176	6.99	5.55753	7.32975	6.76878	6.61201	6.46134	6.3054	6.5132	6.15634	6.67311	6.47304	6.72517	6.97479	6.69319	5.44583	6.28808	6.94734	6.62025
LIF-R	P42702	OID00511	2.19187	2.00242	2.46998	2.90116	2.87584	2.59791	2.77805	2.45014	2.93777	2.44608	2.53095	2.68009	2.42756	2.8164	2.49	2.59142	3.13121	2.9241	2.48715	2.59635	2.6548	2.22002	2.39133	2.19587	2.66157	2.85625	2.29402	2.79895	3.09768	2.78041	3.30004	2.89507	2.53532	2.38227	2.76889	2.90732	2.98002	3.46	3.03789	3.36217	2.7988	2.7811	2.60943	2.70336	2.38992	2.58495	2.70103
MCP-1	P13500	OID00484	10.9526	10.622	11.7429	11.65	11.9181	10.957	11.5453	11.2536	12.5333	12.5836	12.171	11.3742	11.1076	10.9454	10.9849	11.3217	11.9365	11.3945	11.5514	10.4638	11.5778	11.6431	10.9329	11.5386	11.8593	11.1581	10.4963	12.3331	11.4984	11.6241	11.9048	11.8474	11.1529	10.556	12.1929	11.8428	12.26	11.6069	12.41	11.6388	12.379	12.0595	11.1184	11.3345	11.771	12.2154	12.4376
MCP-2	P80075	OID00549	8.53894	8.83715	9.29492	10.0854	8.91412	8.36426	8.82987	8.91414	9.30234	9.46002	8.77706	8.46464	8.64278	8.00127	8.523	9.94797	10.0515	9.28869	8.69028	8.1786	9.04299	9.09327	8.70423	9.08275	8.60056	9.16317	8.21808	10.2225	9.45069	9.8423	9.44592	8.58367	8.57335	8.06064	8.99247	9.81023	9.6233	9.67869	9.30484	9.39057	9.94925	8.63318	9.58129	8.83813	8.46168	9.69719	9.44188
MCP-3	P80098	OID00474	1.09575	1.3578	1.32643	1.67453	2.44416	0.68757	2.27316	1.01586	2.22244	1.77672	2.6778	1.50523	1.08379	1.52517	1.51603	2.59563	1.76308	1.93238	2.29447	1.61315	1.17387	1.48922	1.41088	2.38869	2.20483	1.24434	0.49574	2.8058	2.85001	1.80681	1.58449	1.68055	0.74872	1.39071	2.21393	1.61184	2.10296	1.21725	2.21142	2.0509	2.08618	1.44249	1.55457	1.24123	1.78161	2.25392	2.32106
MCP-4	Q99616	OID00504	14.8202	14.0392	15.3633	15.5338	15.7424	13.9689	15.0519	15.1053	15.9778	15.4023	16.2894	15.7197	15.3807	15.1318	15.0073	15.0442	16.0171	15.0651	14.8641	14.4831	14.9599	15.0284	13.9976	15.2811	15.6641	14.8088	14.6933	16.2077	15.0791	17.6301	15.7568	16.0574	15.316	15.1409	15.7197	15.5024	16.2783	15.5335	15.9626	16.3003	15.9216	15.9132	15.4973	15.1638	15.093	15.5587	15.9299
MMP-1	P03956	OID00510	13.5266	14.7795	14.5317	14.3472	12.5747	14.6575	15.216	15.0942	14.4069	13.2696	14.7263	13.8408	13.8638	15.2724	15.17	14.3244	14.812	15.0655	15.0094	15.3245	14.9517	14.2083	14.7061	14.3592	14.2295	15.1871	14.5551	15.2447	13.6398	15.3891	15.0714	14.6932	13.5333	15.0685	14.8733	15.3195	14.8929	14.5497	15.4388	14.6817	15.465	15.0515	15.3292	13.1551	15.1332	15.4147	14.0863
MMP-10	P09238	OID00527	7.11366	7.2473	7.57248	7.04404	8.35818	7.65256	8.27428	7.04235	6.99613	9.02703	8.8898	8.06699	7.11164	8.57034	7.37023	7.31019	8.03363	7.76344	7.14383	7.05739	7.72985	7.82796	7.57286	6.43699	6.93042	7.33534	7.93918	7.83274	8.50255	8.45583	7.41928	8.27898	7.66134	7.35249	8.85606	7.51301	8.21659	7.7629	7.53969	8.85774	8.40689	7.61372	7.0568	7.62328	7.18705	7.16945	8.92307
OPG	O00300	OID00479	8.72737	8.79027	8.90202	9.32686	9.74596	9.17877	9.59864	8.62285	9.71534	9.20928	9.98664	8.98224	8.93552	8.73837	8.76626	9.23547	9.64821	9.50587	9.13064	9.18276	8.74352	9.0335	8.80809	8.72318	8.79459	9.10523	8.44838	9.59932	10.3199	9.57388	9.46675	9.56566	9.18709	9.18196	9.19939	9.27305	9.73886	9.55047	9.3443	9.88695	9.51	9.41838	8.96777	9.40797	8.83675	9.75874	9.3132
OSM	P13725	OID00494	4.57862	5.06755	4.70609	6.5897	5.83048	5.44887	5.42519	6.07935	6.19756	4.33392	4.00254	5.07228	6.24148	5.85748	6.12418	6.47422	5.2378	5.85389	5.3434	5.66238	5.1417	5.71755	4.91655	6.23437	5.59375	6.96222	3.73904	7.42784	4.78571	5.81803	5.34845	4.06154	3.99883	4.71212	6.27798	6.34358	6.61491	5.35713	6.51816	5.3441	5.38753	5.37757	5.11146	5.21418	3.57509	6.53524	6.61845
PD-L1	Q9NZQ7	OID00518	4.07476	4.76798	4.50332	4.64307	5.23507	4.33586	4.89923	3.87567	5.03319	4.51827	5.12775	4.41746	4.50602	4.71148	4.59023	4.52677	5.30528	4.79197	4.27358	4.4473	4.49557	4.21392	3.9181	4.52662	5.16405	4.03437	4.13978	5.26392	4.72553	4.91291	4.59722	5.22545	4.36195	4.54594	5.99905	5.05147	4.79937	5.49814	4.75727	5.34415	4.74074	4.83777	4.58882	4.77602	4.10554	4.69035	4.60745
SCF	P21583	OID00500	8.274	7.11117	7.17372	8.57267	8.24643	9.08637	8.36142	9.13016	6.83566	8.81261	8.68686	7.86867	9.14317	8.78222	8.81232	9.12172	8.90763	8.74148	8.98033	9.10583	8.70986	9.30807	8.36589	8.01789	7.14873	8.942	8.49196	8.64675	8.20408	9.39287	8.79567	9.30045	8.63518	7.75736	8.48237	8.84745	8.94093	8.4771	8.72549	8.77792	8.98236	7.99294	8.41307	7.57718	8.51765	8.36985	8.73428
SIRT2	Q8IXJ6	OID00538	0.25253	-0.33498	-0.67826	1.17072	0.88445	0.96634	0.82153	0.77845	-0.31509	0.61583	-0.09536	1.47837	1.71796	1.31293	1.2136	1.62067	1.61403	0.18174	0.66094	2.10908	0.62038	1.40258	1.03544	0.26251	-0.06547	1.45132	-0.31495	2.45847	1.00917	0.7149	1.71841	1.38669	0.74292	0.12312	0.91578	1.05564	1.4533	0.36125	1.99862	1.55672	0.45646	1.07706	0.30255	0.01439	0.97955	2.47544	0.4788
SLAMF1	Q13291	OID00502	0.92712	0.88916	0.36895	0.87369	1.35547	1.88506	1.13541	0.817	1.85214	1.82535	1.5544	0.88735	1.28147	1.35873	0.63317	1.33414	2.20004	1.66921	0.89385	1.4354	0.93488	0.86089	0.58522	0.68266	0.94981	0.8489	1.10008	2.09109	0.69482	2.2089	2.30197	1.3029	1.0638	1.52079	0.81877	1.18659	1.16463	1.28669	1.40694	2.60138	0.91159	1.45279	1.43466	1.36153	0.99957	1.10309	1.24496
ST1A1	P50225	OID00557	2.56107	-0.10762	0.03864	4.50476	2.28428	2.47242	2.68998	4.10133	-0.01742	2.22386	1.2411	1.33179	1.83753	2.78983	2.79807	2.32698	2.88402	2.76369	2.3094	3.44563	1.81615	1.64411	2.71359	2.71861	1.04083	3.93506	0.73659	3.66943	1.20694	2.68982	2.96436	2.47244	3.84875	1.35472	2.01002	2.62332	3.71346	1.02849	3.33811	2.86845	3.10204	1.96287	2.13658	0.96695	1.65619	3.16813	2.04921
STAMBP	O95630	OID00558	2.3808	2.09682	1.98408	2.73831	3.35026	2.46265	2.74198	2.44372	2.29033	3.38588	2.40025	3.84201	2.84429	2.52951	3.43493	3.45386	2.88842	2.08236	2.26768	3.02429	2.06421	2.68783	2.53581	2.34977	2.67973	2.88366	1.58854	3.63195	2.79916	2.38947	3.51151	3.09434	2.45417	2.84841	2.61475	3.11981	2.97007	2.53111	3.50189	3.40109	2.68178	3.1564	2.48085	2.64891	2.53202	2.59494	2.31695
TGF-alpha	P01135	OID00503	2.91384	2.98823	3.03693	4.5942	3.62759	3.42377	3.26902	4.35238	4.10171	2.74955	3.29142	3.41097	4.10415	3.87307	4.168	3.66551	3.31633	3.7839	3.42672	3.60515	2.88652	3.41571	3.15145	4.42993	3.82859	4.18928	2.32969	5.46537	2.68596	3.87496	3.67407	2.60296	2.58063	2.71596	4.53899	4.14854	4.46364	3.41897	4.41047	4.41614	4.11462	3.86344	3.74241	3.07212	2.04759	4.10752	3.81655
TNF	P01375	OID05548	0.4388	-0.84274	-0.16775	1.73417	0.44682	1.72363	1.41454	1.27456	-0.52778	4.68026	2.0742	-0.47186	1.58538	1.84251	0.84735	1.33602	2.27977	1.04883	1.83898	1.84443	1.7095	2.2096	1.68302	0.32867	-0.05243	0.96209	0.85336	2.86211	1.86811	2.49763	0.94083	2.67211	1.42936	1.79688	1.77555	2.45796	1.43869	0.5191	2.12983	1.18528	1.55055	0.56127	0.6536	-0.15754	1.99205	1.76285	2.39939
TNFB	P01374	OID00561	4.12985	3.8869	3.87397	4.52851	4.81918	3.89767	4.96282	3.82718	4.28921	4.01447	3.62341	4.58238	3.89325	3.80059	5.02142	4.20845	4.3066	4.13153	4.05361	3.31243	4.41738	3.89719	2.92259	3.84434	3.93302	4.18464	4.44822	3.88142	3.24343	4.49674	5.23438	4.26092	3.75908	3.71365	4.40457	5.13702	4.66664	4.30495	3.88414	4.95346	4.85758	4.29175	5.49791	4.07394	4.14467	4.09316	3.78219
TNFRSF9	Q07011	OID00553	4.93367	4.72068	4.45367	5.25817	5.63034	4.8426	5.07637	4.28901	5.31748	5.49012	7.06236	4.76021	4.87402	4.6231	5.26145	5.56923	5.53294	5.01016	4.72685	4.73118	5.2195	5.11229	4.30351	4.35991	4.59218	4.76526	5.10462	6.1595	5.23613	5.61901	4.79824	5.45418	4.78945	5.10021	5.46118	5.0444	5.0803	5.7427	5.11899	5.5858	5.46976	5.10363	5.07017	4.8322	5.12886	5.16732	4.72039
TNFSF14	O43557	OID00506	4.63679	4.80807	4.27215	6.88323	5.74226	5.56527	5.80559	5.82354	4.08383	5.05247	4.00551	4.76119	5.17223	5.10815	5.82698	6.60219	5.59348	5.39973	5.42923	5.83961	5.06337	5.6427	6.33082	5.31907	5.58469	6.4603	4.08853	7.30584	4.18263	5.63105	5.21995	4.37822	4.8969	4.66242	5.707	6.10703	6.47398	5.19631	6.08784	6.02844	6.65027	5.41032	5.0382	4.97619	4.02914	6.11958	6.20359
TRAIL	P50591	OID00488	7.25017	6.15837	7.23165	7.89479	7.06522	7.66744	7.28416	7.61527	6.02652	7.30721	7.33585	6.80721	7.4731	7.52701	7.33443	8.08024	7.95399	7.54267	7.79675	7.53699	7.84387	7.82083	7.64777	7.19673	6.40336	7.62235	7.51679	7.76509	6.94044	8.09827	7.13751	8.22755	7.84313	7.53079	7.91938	7.50333	7.15606	7.71218	8.09167	7.71327	8.15106	7.48263	7.6519	7.02176	7.85121	7.80708	7.76853
TRANCE	O14788	OID00521	4.7681	4.65187	4.65472	5.2126	4.54019	3.88815	4.33087	4.96182	4.45017	3.36446	3.85106	4.68823	4.23869	4.70795	5.31776	4.81853	4.79535	4.84829	4.44024	4.20044	5.9352	4.23753	4.84287	4.69301	4.4728	4.27715	5.1564	4.1986	3.79905	4.54012	4.04563	4.65201	3.92521	4.94356	5.04317	5.20791	4.19153	4.90147	4.92478	5.87989	5.27193	4.13218	5.02043	3.50929	4.57941	4.00082	4.3086
TSLP	Q969D9	OID00497	-0.17019	-0.15962	-0.55555	-0.39914	-1.45728	-0.34227	-0.60702	-0.27328	-0.00786	0.31309	-0.56239	-0.11524	0.35053	-0.1123	-0.16776	0.34877	-0.47579	0.21809	1.93548	-0.29486	-0.24556	-0.00035	-0.17634	-0.17213	0.86734	-0.41981	-1.23773	-0.68857	-0.07979	-0.46471	0.69742	-0.75552	-0.43362	0.41763	0.31908	-0.38081	-0.10743	0.15954	0.39721	-0.00572	0.03133	-0.70718	-0.46844	0.02194	-0.86588	0.1945	6.44955
TWEAK	O43508	OID00555	8.46149	9.45428	9.29912	9.56709	9.40914	9.09264	8.9816	8.93956	8.35877	8.40596	9.57972	9.57734	8.8505	8.8629	9.00626	9.48903	9.89398	9.48687	9.12869	8.98023	9.39787	8.90268	8.6257	8.82803	9.8364	9.41338	8.57169	9.65279	8.98736	9.42904	9.46891	9.49814	8.89352	8.74058	9.56564	9.87893	9.69106	10.1818	9.48663	10.259	9.09543	9.47839	9.37686	9.15304	8.77965	9.5481	9.32558
uPA	P00749	OID00481	9.01773	9.09597	9.23458	9.33717	10.0887	9.24795	9.41858	8.62411	9.73733	9.38734	9.45324	9.50353	8.82281	8.84595	9.22773	9.26102	9.57842	9.31008	8.90555	8.83917	9.03104	8.84901	8.50224	8.90919	8.87316	8.73689	8.73022	8.90655	9.05727	9.41368	9.2857	9.46192	9.55856	9.00914	9.26554	9.5411	9.44139	10.1187	9.41572	9.74622	9.59011	9.60227	9.41865	9.42416	9.0838	9.42224	9.24473
VEGFA	P15692	OID00472	11.0194	11.8561	12.3768	11.773	12.0703	10.3648	11.9437	12.0012	11.6961	10.6438	11.3964	11.8566	10.9519	11.0776	10.7246	11.2256	12.2436	10.971	11.4188	11.7302	12.3447	10.9378	11.1494	10.2356	11.0727	12.3128	10.3573	12.5852	10.5263	12.2958	11.3036	12.1797	12.1984	10.6928	10.6769	11.6189	11.0185	12.0453	11.959	12.211	11.0314	10.9618	11.5454	10.9707	11.2499	12.7204	12.0522
[truncated: 569 more columns]
